# Supplementary material
Source: PubMed Central journal article supplement (PMC5204372)
Supplement: NIHMS69663-supplement-Supplementary_information.pdf [file NIHMS69663-supplement-Supplementary_information.pdf]

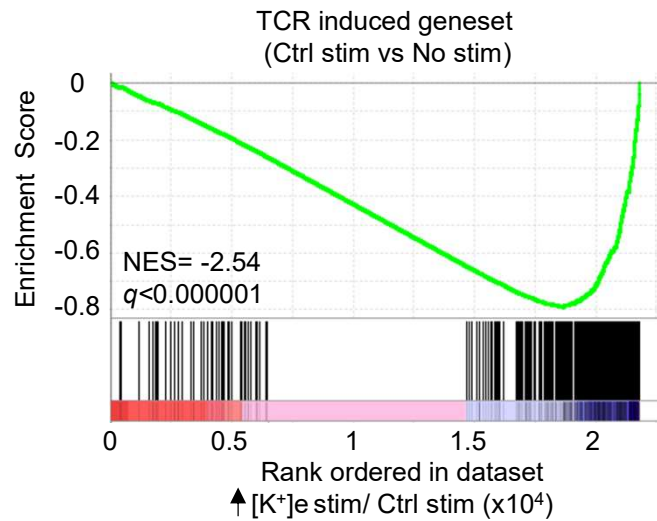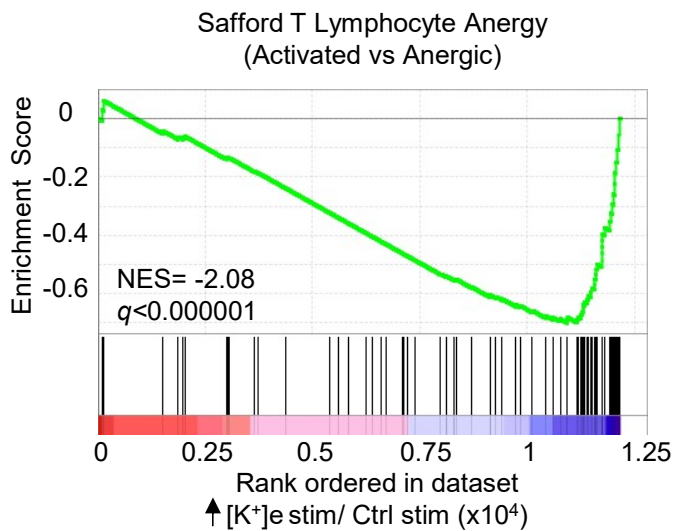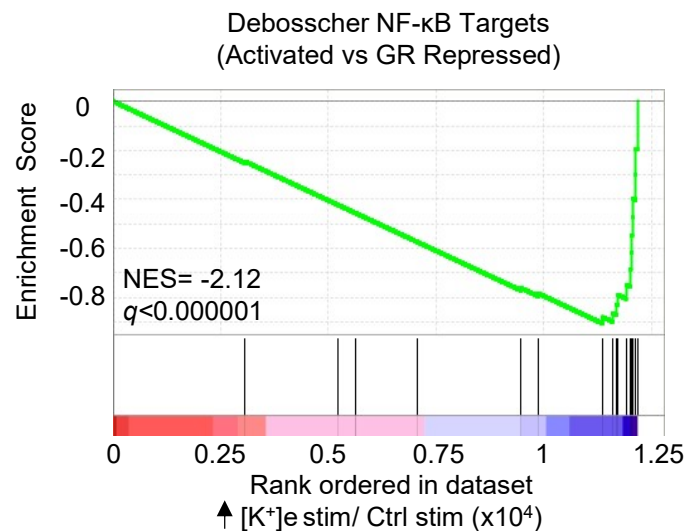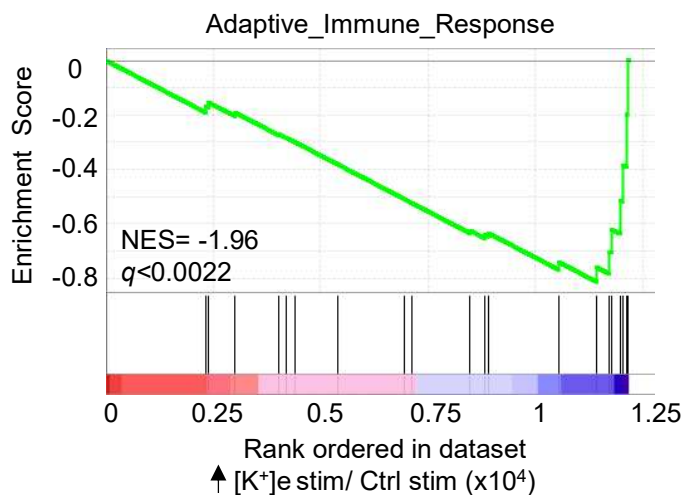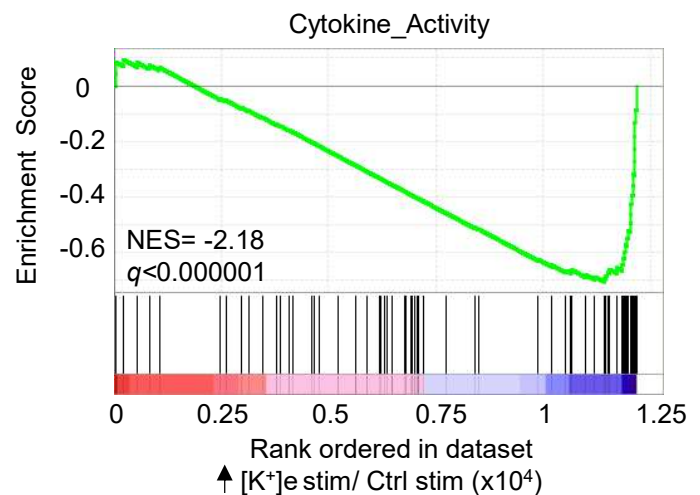

**Supplementary Information 1. Elevated [K<sup>+</sup>]e limits TCR induction of transcriptional programs required for effector T cell function.**

(a-e) Gene set enrichment analysis against the indicated dataset of transcriptional logarithmic ratiometric differences between primed T cells briefly activated in the presence or absence of elevated [K<sup>+</sup>]e (Elevated [K<sup>+</sup>]e stim / Ctrl stim). Kolmogorov-Smirnov statistic was used to calculate statistical significance. Additional [K<sup>+</sup>]e equal to 40 mM.

|                                                             |              | TCR Stim +             | TCR Stim +             | TCR Stim -             | TCR Stim -             |
|-------------------------------------------------------------|--------------|------------------------|------------------------|------------------------|------------------------|
|                                                             |              | ↑ [K <sup>+</sup> ]e - | ↑ [K <sup>+</sup> ]e + | ↑ [K <sup>+</sup> ]e - | ↑ [K <sup>+</sup> ]e + |
| Voltage-gated delayed rectified "Shaker" related            | <i>Kcna1</i> | 0.00                   | 0.00                   | 0.00                   | 0.00                   |
|                                                             | <i>Kcna2</i> | 0.29                   | 0.32                   | 2.04                   | 1.86                   |
|                                                             | <i>Kcna3</i> | 183.95                 | 133.06                 | 46.80                  | 48.47                  |
|                                                             | <i>Kcna4</i> | 0.00                   | 0.01                   | 0.02                   | 0.01                   |
|                                                             | <i>Kcna5</i> | 0.01                   | 0.00                   | 0.00                   | 0.00                   |
|                                                             | <i>Kcna6</i> | 0.00                   | 0.00                   | 0.00                   | 0.00                   |
|                                                             | <i>Kcna7</i> | 0.32                   | 0.33                   | 0.00                   | 0.00                   |
| Voltage-gated "Shaw" related                                | <i>Kcnc1</i> | 0.15                   | 0.28                   | 0.93                   | 0.71                   |
|                                                             | <i>Kcnc2</i> | 0.00                   | 0.00                   | 0.00                   | 0.00                   |
|                                                             | <i>Kcnc3</i> | 0.12                   | 0.11                   | 0.01                   | 0.04                   |
|                                                             | <i>Kcnc4</i> | 0.00                   | 0.00                   | 0.00                   | 0.00                   |
| Intermediate / small conductance Ca <sup>2+</sup> activated | <i>Kcnn1</i> | 0.00                   | 0.02                   | 0.00                   | 0.02                   |
|                                                             | <i>Kcnn2</i> | 0.00                   | 0.00                   | 0.00                   | 0.00                   |
|                                                             | <i>Kcnn3</i> | 0.00                   | 0.00                   | 0.00                   | 0.00                   |
|                                                             | <i>Kcnn4</i> | 91.15                  | 76.47                  | 90.00                  | 90.73                  |

|                         |                                       | TCR Stim +             | TCR Stim +             | TCR Stim -             | TCR Stim -             |      |
|-------------------------|---------------------------------------|------------------------|------------------------|------------------------|------------------------|------|
|                         |                                       | ↑ [K <sup>+</sup> ]e - | ↑ [K <sup>+</sup> ]e + | ↑ [K <sup>+</sup> ]e - | ↑ [K <sup>+</sup> ]e + |      |
| Two-pore domain channel | <i>Kcnk1</i>                          | 0.01                   | 0.00                   | 0.01                   | 0.00                   |      |
|                         | <i>Kcnk2</i>                          | 0.00                   | 0.00                   | 0.00                   | 0.00                   |      |
|                         | <i>Kcnk3</i>                          | 0.03                   | 0.02                   | 0.01                   | 0.00                   |      |
|                         | <i>Kcnk4</i>                          | 0.01                   | 0.00                   | 0.00                   | 0.00                   |      |
|                         | <i>Kcnk5</i>                          | 20.78                  | 22.21                  | 4.46                   | 4.58                   |      |
|                         | <i>Kcnk6</i>                          | 1.83                   | 2.23                   | 2.16                   | 2.41                   |      |
|                         | <i>Kcnk7</i>                          | 0.41                   | 0.58                   | 1.02                   | 0.86                   |      |
|                         | <i>Kcnk9</i>                          | 0.00                   | 0.00                   | 0.00                   | 0.00                   |      |
|                         | <i>Kcnk10</i>                         | 1.12                   | 0.44                   | 0.09                   | 0.10                   |      |
|                         | <i>Kcnk12</i>                         | 0.15                   | 0.11                   | 0.01                   | 0.01                   |      |
|                         | Inwardly-rectifying slowly activating | <i>Kcnh3</i>           | 0.03                   | 0.05                   | 0.04                   | 0.04 |
|                         |                                       | <i>Kcnh4</i>           | 2.91                   | 2.17                   | 0.07                   | 0.03 |
| <i>Kcnh8</i>            |                                       | 0.00                   | 0.00                   | 0.00                   | 0.00                   |      |

|                                                              |                | TCR Stim +             | TCR Stim +             | TCR Stim -             | TCR Stim -             |
|--------------------------------------------------------------|----------------|------------------------|------------------------|------------------------|------------------------|
|                                                              |                | ↑ [K <sup>+</sup> ]e - | ↑ [K <sup>+</sup> ]e + | ↑ [K <sup>+</sup> ]e - | ↑ [K <sup>+</sup> ]e + |
| Alpha-subunit Na <sup>+</sup> ,K <sup>+</sup> ATPase         | <i>Atp1a1</i>  | 304.94                 | 239.26                 | 99.95                  | 100.20                 |
|                                                              | <i>Atp1a2</i>  | 0.00                   | 0.00                   | 0.00                   | 0.00                   |
|                                                              | <i>Atp1a3</i>  | 0.07                   | 0.09                   | 0.51                   | 0.52                   |
|                                                              | <i>Atp1a4</i>  | 0.00                   | 0.00                   | 0.00                   | 0.00                   |
| Beta-subunit Na <sup>+</sup> ,K <sup>+</sup> ATPase          | <i>Atp1b1</i>  | 17.46                  | 12.26                  | 14.52                  | 14.32                  |
|                                                              | <i>Atp1b2</i>  | 0.57                   | 0.51                   | 0.07                   | 0.06                   |
|                                                              | <i>Atp1b3</i>  | 141.85                 | 152.37                 | 373.08                 | 372.90                 |
|                                                              | <i>Atp1b4</i>  | 0.00                   | 0.00                   | 0.00                   | 0.00                   |
| Fxyd domain containing ion transport regulator               | <i>Fxyd1</i>   | 0.74                   | 0.58                   | 0.21                   | 0.57                   |
|                                                              | <i>Fxyd2</i>   | 0.19                   | 0.00                   | 0.14                   | 0.03                   |
|                                                              | <i>Fxyd3</i>   | 0.00                   | 0.00                   | 0.00                   | 0.00                   |
|                                                              | <i>Fxyd4</i>   | 0.21                   | 0.08                   | 0.14                   | 0.23                   |
|                                                              | <i>Fxyd5</i>   | 478.10                 | 398.84                 | 454.65                 | 424.89                 |
|                                                              | <i>Fxyd6</i>   | 0.01                   | 0.00                   | 0.01                   | 0.01                   |
| Electro-neutral K <sup>+</sup> , Cl <sup>-</sup> transporter | <i>Slc12a1</i> | 0.00                   | 0.00                   | 0.00                   | 0.00                   |
|                                                              | <i>Slc12a2</i> | 8.11                   | 8.88                   | 3.41                   | 3.17                   |
|                                                              | <i>Slc12a3</i> | 0.01                   | 0.01                   | 0.01                   | 0.02                   |
|                                                              | <i>Slc12a4</i> | 14.74                  | 15.23                  | 6.05                   | 5.68                   |
|                                                              | <i>Slc12a5</i> | 0.06                   | 0.08                   | 0.03                   | 0.03                   |
|                                                              | <i>Slc12a6</i> | 3.67                   | 6.95                   | 24.21                  | 25.19                  |
|                                                              | <i>Slc12a7</i> | 6.92                   | 9.61                   | 33.83                  | 34.88                  |
|                                                              | <i>Slc12a8</i> | 0.14                   | 0.25                   | 0.36                   | 0.38                   |
|                                                              | <i>Slc12a9</i> | 1.58                   | 2.18                   | 4.42                   | 4.84                   |

|                                            |               | TCR Stim +             | TCR Stim +             | TCR Stim -             | TCR Stim -             |
|--------------------------------------------|---------------|------------------------|------------------------|------------------------|------------------------|
|                                            |               | ↑ [K <sup>+</sup> ]e - | ↑ [K <sup>+</sup> ]e + | ↑ [K <sup>+</sup> ]e - | ↑ [K <sup>+</sup> ]e + |
| Voltage-gated beta subunit                 | <i>Kcnab1</i> | 0.03                   | 0.04                   | 0.04                   | 0.01                   |
|                                            | <i>Kcnab2</i> | 23.08                  | 26.03                  | 63.83                  | 63.81                  |
|                                            | <i>Kcnab3</i> | 0.05                   | 0.11                   | 0.22                   | 0.15                   |
| K <sub>v</sub> channel interacting protein | <i>Kcnip1</i> | 2.27                   | 2.45                   | 0.80                   | 0.00                   |
|                                            | <i>Kcnip2</i> | 0.80                   | 1.78                   | 6.54                   | 8.50                   |
|                                            | <i>Kcnip3</i> | 0.03                   | 0.08                   | 0.05                   | 0.10                   |
|                                            | <i>Kcnip4</i> | 0.45                   | 0.46                   | 0.62                   | 0.68                   |

## Supplementary Information 2. TCR dependent dynamic expression of potassium channels and pumps.

Averaged RPKM (Reads per kilobase per megabase) normalized values from three biological replicates of selected transcripts from FACS purified mouse CD8<sup>+</sup> T cells in the indicated condition with or without 2 hour TCR stimulation via anti-CD3/28, additional [K<sup>+</sup>]e equal to 40mM and being isotonic to RPMI 1640.
