# Supplementary material
Source: PubMed Central journal article supplement (PMC5204372)

Figure 1e

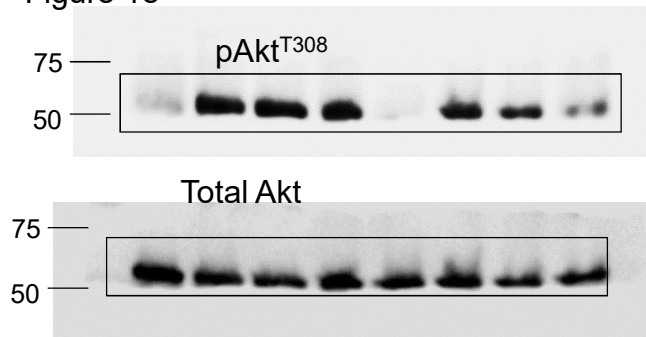

Extended Data 3c

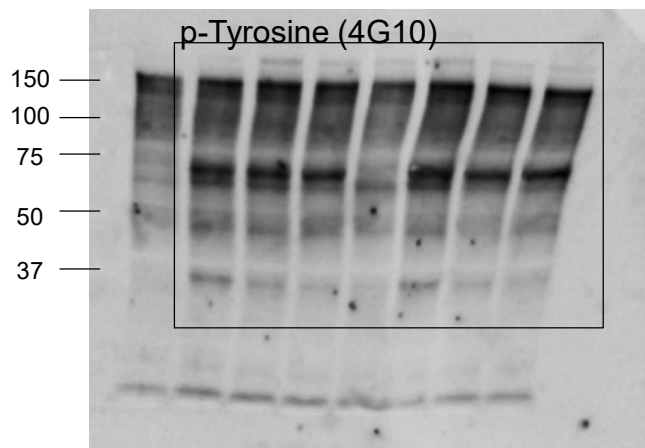

pAkt  
substrate  
RXXpS/T

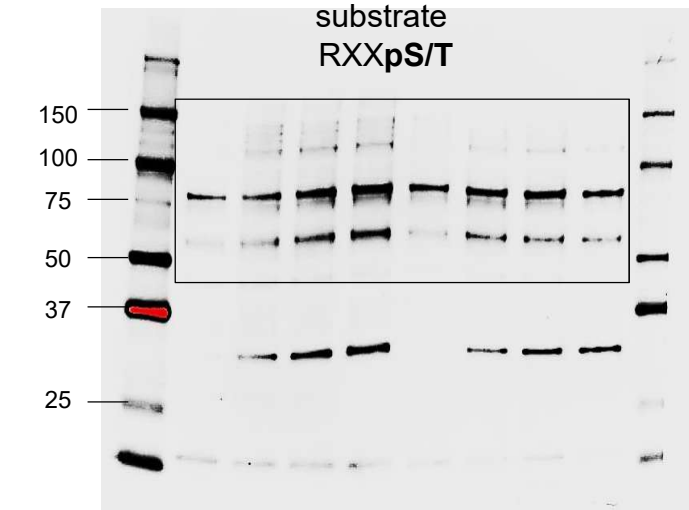

$\beta$ -actin

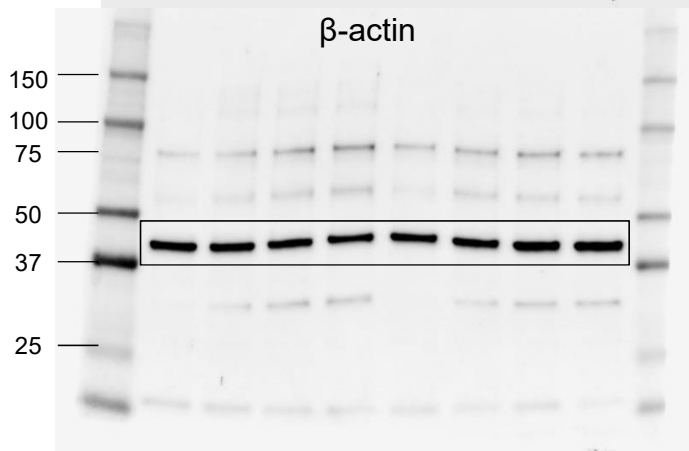

Figure 4b

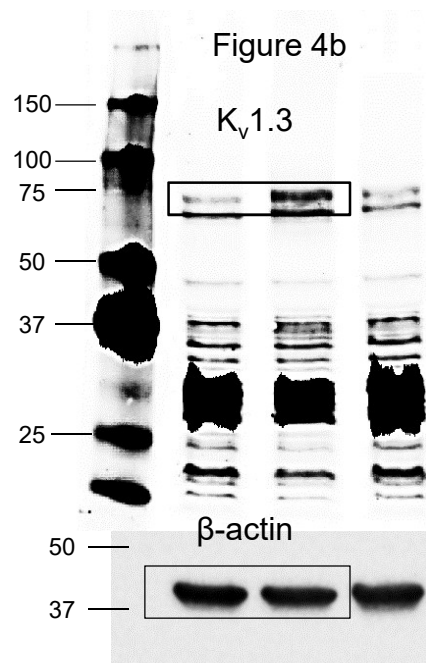

Supplement: NIHMS69663-supplement-3.pdf [file NIHMS69663-supplement-3.pdf]
